# Supplementary material for: Impact of climate and hydrochemistry on shape variation – a case study on Neotropical cytheroidean Ostracoda
Source: Copernicus journal article supplement (doi:10.5194/bg-2017-390), 2017-11-10
Supplement: Supplementary file 1 [file bg-2017-390-supplement.pdf]

## Females LV

RW 1

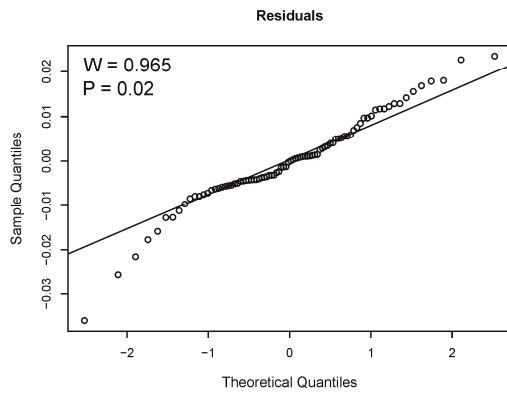

## Females RV

RW 2

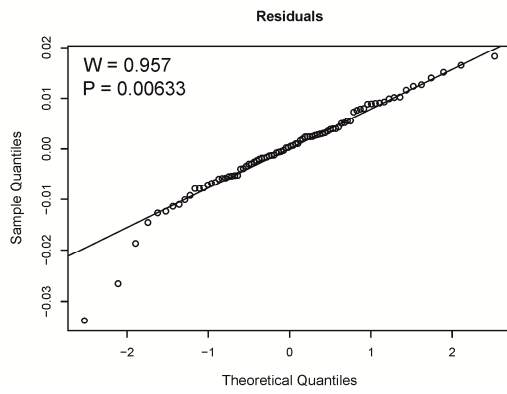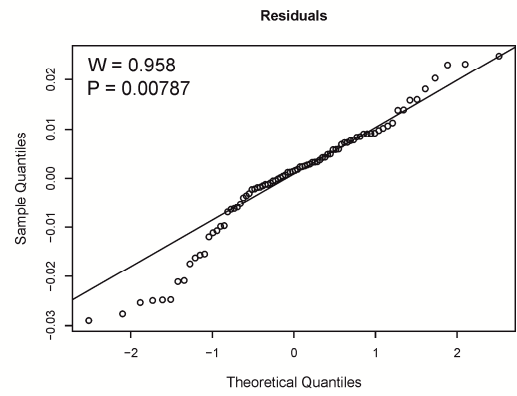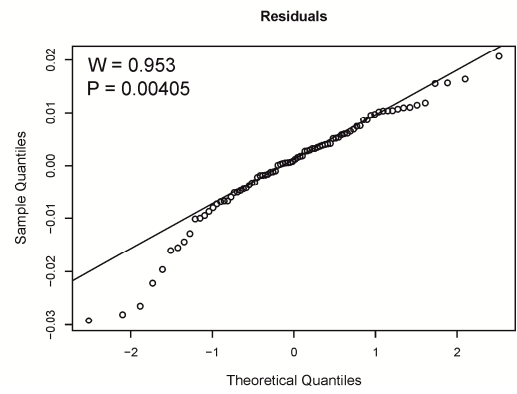

**S 2: Data and results of RWA, PLS, MR, normality tests of females and males left and right valves.**
